# Supplementary material for: Adaptations of Escherichia coli K 12 to Synchrotron Sourced THz Radiation
Source: PubMed Central journal article supplement — ACS Omega. 2024 Dec 5;9(50):49878–86. doi: 10.1021/acsomega.4c08710 (PMC11656235; doi:10.1021/acsomega.4c08710), 2024-12-05
Supplement: ao4c08710_si_001.pdf [file ao4c08710_si_001.pdf]

## Supporting Information

### Adaptations of *Escherichia coli* K 12 to Synchrotron Sourced THz

#### Radiation

Elena P. Ivanova<sup>a\*</sup>, The Hong Phong Nguyen<sup>a</sup>, Denver P. Linklater<sup>b</sup>, Phuc H. Le<sup>a, c</sup>, Zoltan Vilagosh<sup>a</sup>, Palalle G. Tharushi Perera<sup>a</sup>, Dominique R. T. Appadoo<sup>d</sup>, Jitraporn Vongsvivut<sup>d</sup>, Tanavi Sharma<sup>e</sup>, Michael G Leeming<sup>e</sup>, Nicholas A. Williamson<sup>e</sup>, Eric Hanssen<sup>c</sup>, Chaitali Dekiwadia<sup>f</sup>, Mark J. Tobin<sup>d</sup>, Saulius Juodkazis<sup>g</sup>, Rodney J. Croft<sup>h</sup>

<sup>a</sup> STEM College, School of Science, RMIT University, Melbourne, VIC 3000, Australia

<sup>b</sup> Biomedical Engineering, Graeme Clark Institute, The University of Melbourne, Parkville, VIC 3010, Australia

<sup>c</sup> Ian Holmes Imaging Centre, ARC Centre for Cryo Electron Microscopy of Membrane Protein and Department of Biochemistry and Pharmacology, Bio21 Institute, University of Melbourne, Parkville, VIC 3052, Australia

<sup>d</sup> THz/Far-IR Beamline, ANSTO – Australian Synchrotron, Clayton, VIC 3168, Australia

<sup>e</sup> Melbourne Mass Spectrometry and Proteomics Facility, Bio 21 Molecular Science and Biotechnology Institute, University of Melbourne, Parkville, VIC 3010 Australia

<sup>f</sup> RMIT Microscopy and Microanalysis Facility, College of Science, Engineering and Health, RMIT University, P.O. Box 2476, Melbourne, VIC 3001, Australia

<sup>g</sup> Centre for Quantum and Optical Sciences, Swinburne University of Technology, Hawthorn, VIC 3122, Australia

<sup>h</sup> School of Psychology, University of Wollongong, Wollongong, NSW 2522, Australia

\*Corresponding author, email: [elena.ivanova@rmit.edu.au](mailto:elena.ivanova@rmit.edu.au)

**Table S1.** Proteins significantly expressed by *E. coli* cells exposed to SS THz radiation for 10, 30 and 90 minutes.

| Time   | IDs    | Gene IDs                                                                                                                        | Molecular function                                                                                                                                                                                               | Biological process                                                                                                                                                                |
|--------|--------|---------------------------------------------------------------------------------------------------------------------------------|------------------------------------------------------------------------------------------------------------------------------------------------------------------------------------------------------------------|-----------------------------------------------------------------------------------------------------------------------------------------------------------------------------------|
| 10 min | P75694 | yahO                                                                                                                            | No information                                                                                                                                                                                                   | response to radiation                                                                                                                                                             |
| 30 min | P76226 | ynjF                                                                                                                            | phosphotransferase activity, for other substituted phosphate groups                                                                                                                                              | phospholipid biosynthetic process                                                                                                                                                 |
|        | P0A998 | ftnA                                                                                                                            | ferric iron binding; ferrous iron binding; ferroxidase activity; identical protein binding; iron ion sequestering activity                                                                                       | cellular response to iron ion; DNA damage response; intracellular iron ion homeostasis; intracellular sequestering of iron ion; iron ion transport; response to oxidative stress  |
|        | P37047 | cdaR                                                                                                                            | DNA-binding transcription factor activity                                                                                                                                                                        | positive regulation of DNA-templated transcription                                                                                                                                |
|        | P69776 | lpp                                                                                                                             | identical protein binding; lipid binding; peptidoglycan binding                                                                                                                                                  | lipid modification; periplasmic space organization                                                                                                                                |
|        | P69741 | hybO                                                                                                                            | 3 iron, 4 sulfur cluster binding; 4 iron, 4 sulfur cluster binding; electron transfer activity; ferredoxin hydrogenase activity; hydrogenase (acceptor) activity; iron-sulfur cluster binding; metal ion binding | anaerobic respiration                                                                                                                                                             |
|        | P33916 | yejF                                                                                                                            | ATP binding; ATP hydrolysis activity; ATPase-coupled transmembrane transporter activity; transmembrane transporter activity                                                                                      | microcin transport; oligopeptide transmembrane transport; peptide transport                                                                                                       |
|        | P06989 | hisI                                                                                                                            | No information                                                                                                                                                                                                   | amino acid biosynthetic process; histidine biosynthetic process                                                                                                                   |
|        | P64545 | yfgG                                                                                                                            | No information                                                                                                                                                                                                   | stress response to metal ion; stress response to nickel ion                                                                                                                       |
|        | P00903 | pabA                                                                                                                            | 4-amino-4-deoxychorismate synthase activity; protein heterodimerization activity                                                                                                                                 | folic acid biosynthetic process; glutamine metabolic process; para-aminobenzoic acid biosynthetic process; tetrahydrofolate biosynthetic process; tryptophan biosynthetic process |
|        | P26648 | ftsP                                                                                                                            | copper ion binding; oxidoreductase activity                                                                                                                                                                      | cell division; FtsZ-dependent cytokinesis; response to ionizing radiation; response to oxidative stress; response to stress                                                       |
|        | P00805 | ansB                                                                                                                            | asparaginase activity; identical protein binding                                                                                                                                                                 | asparagine catabolic process; protein homotetramerization                                                                                                                         |
|        | P0ABF8 | pgsA                                                                                                                            | CDP-diacylglycerol-glycerol-3-phosphate 3-phosphatidyltransferase activity                                                                                                                                       | glycerophospholipid biosynthetic process; phosphatidylglycerol biosynthetic process                                                                                               |
|        | P0A6M2 | dsbB                                                                                                                            | electron transfer activity; oxidoreductase activity, acting on a sulfur group of donors, quinone or similar compound as acceptor; protein-disulfide reductase activity; ubiquinone binding                       | protein folding; response to heat                                                                                                                                                 |
|        | P23894 | hypX                                                                                                                            | metalloendopeptidase activity; zinc ion binding                                                                                                                                                                  | proteolysis; response to temperature stimulus                                                                                                                                     |
| P41407 | azoR   | azobenzene reductase activity; electron transfer activity; FMN binding; n oxidoreductase activity, acting on NAD(P)H, NAD(P) as | response to oxidative stress                                                                                                                                                                                     |                                                                                                                                                                                   |

|        |        |      |                                                                                                                                                                                         |                                                                                                                                                                                                   |
|--------|--------|------|-----------------------------------------------------------------------------------------------------------------------------------------------------------------------------------------|---------------------------------------------------------------------------------------------------------------------------------------------------------------------------------------------------|
|        |        |      | acceptor; oxidoreductase activity, acting on NAD(P)H, quinone or similar compound as acceptor; protein homodimerization activity                                                        |                                                                                                                                                                                                   |
|        | P38683 | torT | DNA-binding transcription factor activity; transcription cis-regulatory region binding                                                                                                  | anaerobic respiration; regulation of DNA-templated transcription                                                                                                                                  |
| 90 min | P0A8C1 | cbpM | enzyme inhibitor activity                                                                                                                                                               | No information                                                                                                                                                                                    |
|        | P0AFH8 | cutA | copper ion binding; metal ion binding                                                                                                                                                   | response to copper ion                                                                                                                                                                            |
|        | P0AFF4 | nupG | cytidine transmembrane transporter activity; nucleoside:proton symporter activity; pyrimidine nucleoside transmembrane transporter activity; uridine transmembrane transporter activity | adenosine transport; nucleoside transmembrane transport; organic substance transport; purine nucleoside transmembrane transport; pyrimidine nucleoside transport; uridine transmembrane transport |
|        | P69488 | osmY | No information                                                                                                                                                                          | chaperone-mediated protein folding; hyperosmotic response; response to osmotic stress                                                                                                             |
|        | P63264 | ybjQ | No information                                                                                                                                                                          | No information                                                                                                                                                                                    |

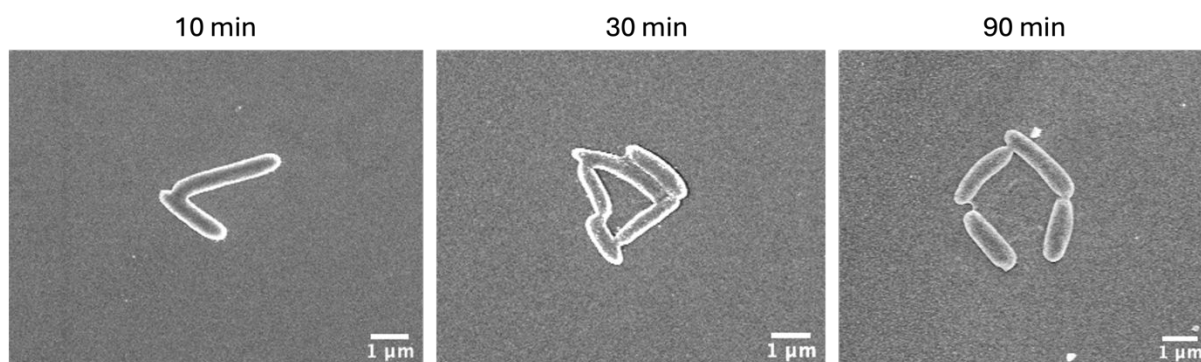

**Figure S1.** Morphology of *E. coli* cells that were not exposed to SS THz radiation. The scale bar in the SEM image represents 1  $\mu\text{m}$ .
